# Supplementary material
Source: PubMed Central journal article supplement (PMC1740420)
Supplement: oenvmed_60_11_810__1.pdf [file oenvmed_60_11_810__1.pdf]

| Cancer site        | Employment years<br>in SAS | Women |       |      |               | Men |       |      |               |
|--------------------|----------------------------|-------|-------|------|---------------|-----|-------|------|---------------|
|                    |                            | O*    | E†    | SIR‡ | 95% CI        | O*  | E†    | SIR‡ | 95% CI        |
| All cancer         | <10                        | 35    | 31.48 | 1.11 | 0.74 to 1.48  | 9   | 6.66  | 1.35 | 0.62 to 2.56  |
|                    | 10–19                      | 24    | 29.91 | 0.80 | 0.48 to 1.12  | 7   | 6.91  | 1.01 | 0.41 to 2.09  |
|                    | ≥20                        | 14    | 12.19 | 1.15 | 0.63 to 1.93  | 16  | 13.51 | 1.18 | 0.68 to 1.92  |
| Breast cancer      | <10                        | 13    | 9.56  | 1.36 | 0.72 to 2.32  | –   | –     | –    | –             |
|                    | 10–19                      | 13    | 10.32 | 1.26 | 0.67 to 2.15  | –   | –     | –    | –             |
|                    | ≥20                        | 7     | 5.04  | 1.39 | 0.56 to 2.86  | –   | –     | –    | –             |
| Malignant melanoma | <10                        | 6     | 2.45  | 2.45 | 0.90 to 5.33  | 2   | 0.48  | 4.15 | 0.50 to 14.98 |
|                    | 10–19                      | 2     | 1.86  | 1.08 | 0.13 to 3.89  | 3   | 0.46  | 6.59 | 1.36 to 19.25 |
|                    | ≥20                        | 3     | 0.65  | 4.60 | 0.95 to 13.44 | 1   | 0.63  | 1.59 | 0.04 to 8.86  |

\*Observed number of cases.

†Expected number of cases, taking age and calendar period into consideration.

‡SIR, standardised incidence ratio.
